# Supplementary material for: Growing bimetallic CoNi-MOF derivatives between MXene layers with hierarchically coral-like interfaces for enhanced electromagnetic wave absorption
Source: Royal Society of Chemistry journal article supplement (doi:10.1039/d4ta05088f), 2024-01-01
Supplement: d4ta05088f1.pdf [file d4ta05088f1.pdf]

1 **Supporting information**

2 **Growing bimetallic CoNi-MOF derivatives between MXene layers with**  
3 **hierarchically coral-like interfaces for enhanced electromagnetic wave absorption**

4 Jiajia Zheng<sup>a</sup>, Chenhui Xu<sup>a</sup>, Zhihui Li<sup>a</sup>, Cheng Gu<sup>a</sup>, Xiping Li<sup>a</sup>, Zhaochun Li<sup>b</sup>, Yancheng Li<sup>c</sup>, Gang  
5 Lou<sup>d</sup>, Yiming Chen<sup>a,\*</sup>

6 <sup>a</sup> *Key Laboratory of Urban Rail Transit Intelligent Operation and Maintenance Technology &*  
7 *Equipment of Zhejiang Province, College of Engineering, Zhejiang Normal University, Jinhua*  
8 *321004, China.*

9 <sup>b</sup> *College of Mechanical and Electronic Engineering, Nanjing Forestry University, Nanjing 210037,*  
10 *China.*

11 <sup>c</sup> *School of Civil and Environmental Engineering, University of Technology Sydney, Sydney 2007,*  
12 *Australia.*

13 <sup>d</sup> *Zhejiang Provincial Key Laboratory of Solid State Optoelectronic Devices, College of Physics and*  
14 *Electronic Information Engineering, Zhejiang Normal University, Jinhua 321004, China.*

15 *\*Email: yiming.chen@zjnu.edu.cn (Y. Chen)*

16

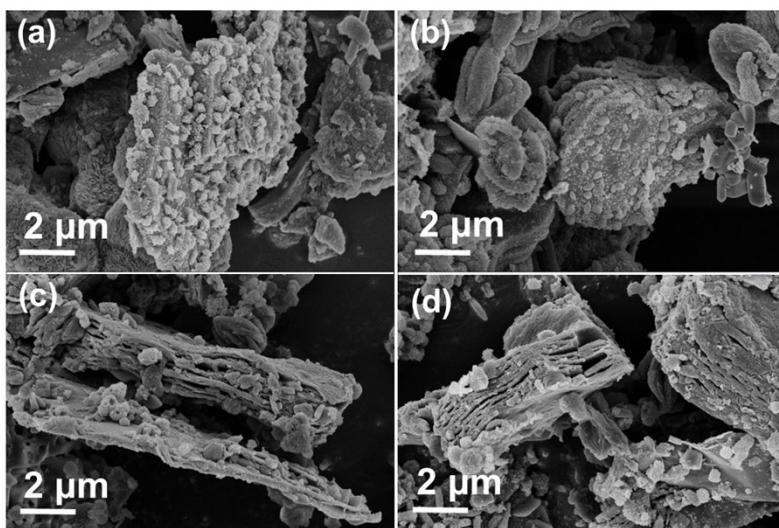

17  
 18 **Fig. S1.** The SEM images of (a) 3MXene/CoNi-MOF, (b) 4MXene/CoNi-MOF, (c) 5MXene/CoNi-  
 19 MOF, and (d) 6MXene/CoNi-MOF composites.

20

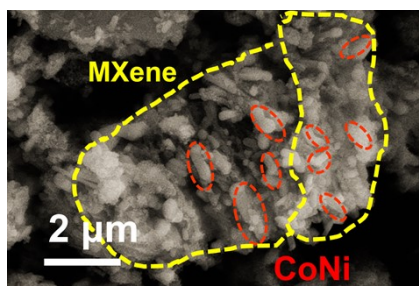

21  
 22 **Fig. S2.** SEM image of 5MXene/CoNi@C before EDS sweeping.

23

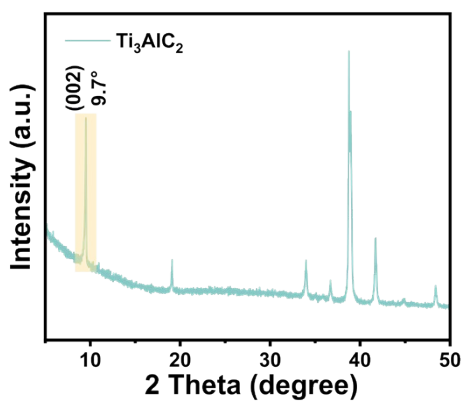

24  
 25 **Fig. S3.** XRD pattern of  $Ti_3AlC_2$ .

26

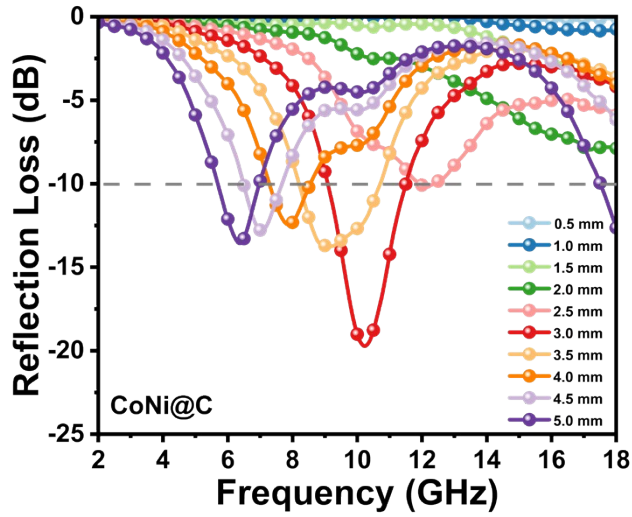

27

28 **Fig. S4.** The RL values of CoNi@C.

29

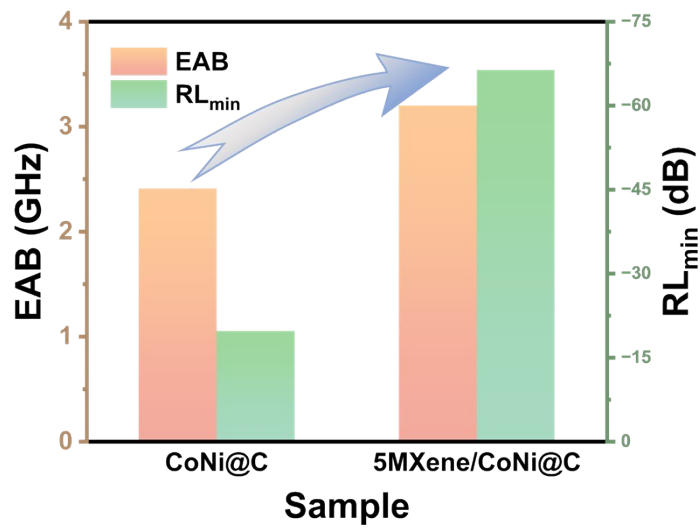

30

31 **Fig. S5.** The RL<sub>min</sub> values and maximum EAB of CoNi@C and 5MXene/CoNi@C.

32

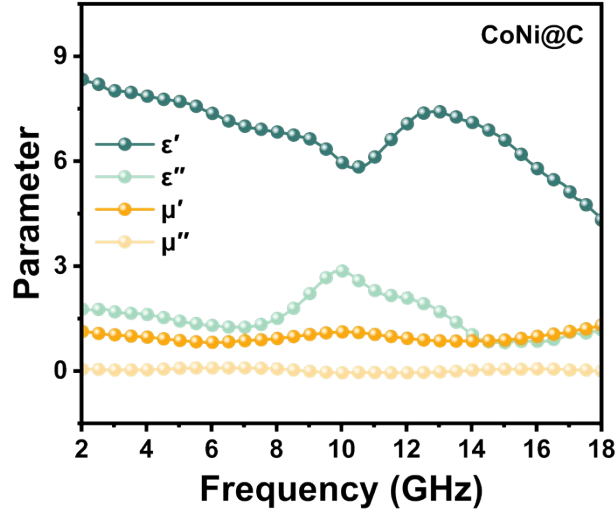

33

34 **Fig. S6.** The permittivity and permeability versus frequency of CoNi@C.

35

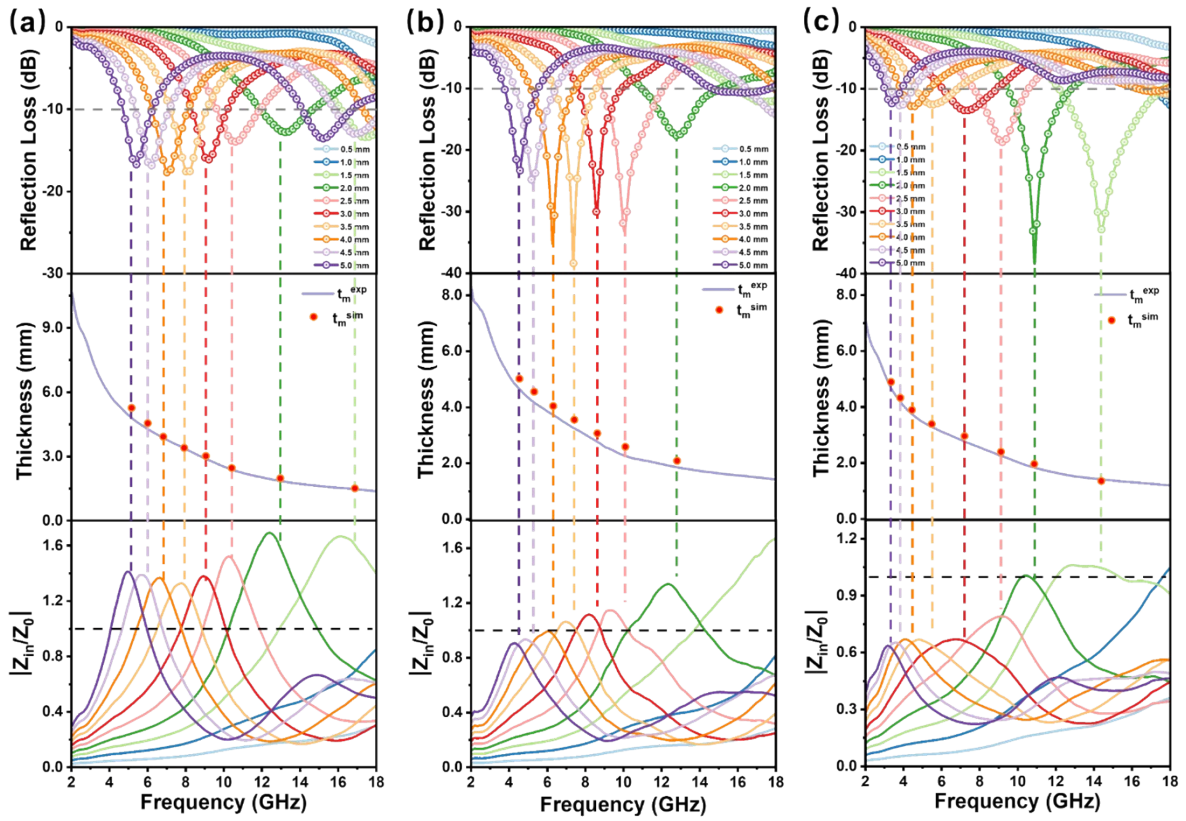

36

37 **Fig. S7.** The *RL* values at various thicknesses and theoretical matching thickness curves of (a)

38 3MXene/CoNi@C, (b) 4MXene/CoNi@C, and (c) 6MXene/CoNi@C at different frequencies.

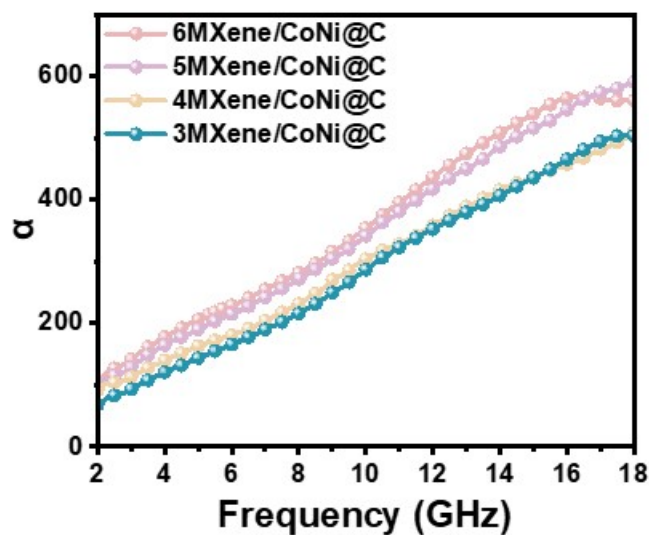

39

40 **Fig. S8.** The attenuation constants of MXene/CoNi@C.

41

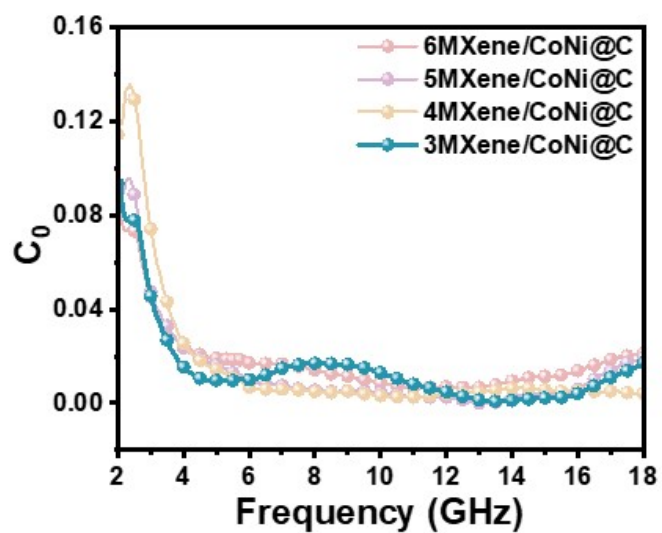

42

43 **Fig. S9.** The  $C_0$  values of MXene/CoNi@C.

44

45

46

47

48

49

50 **Table S1.** Comparison of the EWA properties of 5MXene/CoNi@C and other reported materials.

| Materials                                                                                                         | Thickness (mm) | RL <sub>min</sub> (dB) | EAB (GHz) | Ref.             |
|-------------------------------------------------------------------------------------------------------------------|----------------|------------------------|-----------|------------------|
| M-CN                                                                                                              | 2.20           | -42.5                  | 3.20      | 1                |
| Ti <sub>3</sub> C <sub>2</sub> T <sub>x</sub> /Ni <sub>0.5</sub> Zn <sub>0.5</sub> Fe <sub>2</sub> O <sub>4</sub> | 6.50           | -42.5                  | 3.00      | 2                |
| Ti <sub>3</sub> C <sub>2</sub> T <sub>x</sub> /ZnO                                                                | 4.00           | -26.3                  | 1.40      | 3                |
| CNT/Ti <sub>3</sub> C <sub>2</sub>                                                                                | 3.95           | -24.4                  | 4.20      | 4                |
| CoFe <sub>2</sub> O <sub>4</sub> @CNT                                                                             | 2.50           | -34.6                  | 7.10      | 5                |
| Fe <sub>3</sub> O <sub>4</sub> @Ti <sub>3</sub> C <sub>2</sub> T <sub>x</sub>                                     | 4.20           | -57.2                  | 1.40      | 6                |
| Ti <sub>3</sub> C <sub>2</sub> T <sub>x</sub> @NiCo <sub>2</sub> O <sub>4</sub>                                   | 2.20           | -51.0                  | 1.00      | 7                |
| MXene/Co                                                                                                          | 1.00           | -46.5                  | 3.00      | 8                |
| WS <sub>2</sub> /NiO                                                                                              | 4.30           | -53.3                  | 2.00      | 9                |
| MMC                                                                                                               | 2.90           | -53.7                  | 3.00      | 10               |
| CoNi/N-CNTs                                                                                                       | 3.80           | -52.6                  | 3.12      | 11               |
| RGO/CoFe <sub>2</sub> O <sub>4</sub> /ZnS                                                                         | 1.80           | -43.2                  | 5.50      | 12               |
| TiO <sub>2</sub> @C-Ni/CNT                                                                                        | 1.60           | -32.3                  | 5.50      | 13               |
| Na <sub>2</sub> Ti <sub>3</sub> O <sub>7</sub> /MQDs                                                              | 2.60           | -48.3                  | 6.40      | 14               |
| MXene/TiO <sub>2</sub> /NCNTs                                                                                     | 1.65           | -55.8                  | 5.90      | 15               |
| 5MXene/CoNi@C                                                                                                     | 2.50           | -68.1                  | 3.20      | <b>This work</b> |

51

52 **References**

- 53 1. D. Jin, H. Chen, Y. Du, X. Yang and X. Ren, *Mater. Sci. Eng. B*, 2022, **286**, 116026.
- 54 2. J. He, L. Deng, H. Luo, L. He, D. Shan, S. Yan and S. Huang, *J. Magn. Magn. Mater.*, 2019, **473**,
- 55 184-189.
- 56 3. Y. Qian, H. Wei, J. Dong, Y. Du, X. Fang, W. Zheng, Y. Sun and Z. Jiang, *Ceram. Int.*, 2017, **43**,

- 57 10757-10762.
- 58 4. X. Liu, N. Chai, Z. Yu, H. Xu, X. Li, J. Liu, X. Yin and R. Riedel, *J. Mater. Sci. Technol.*, 2019,  
59 **35**, 2859-2867.
- 60 5. G. Liu, L. Wang, H. Zhang, Z. Du, X. Zhou, K. Wang, Y. Sun and S. Gao, *Compos. Commun.*  
61 2021, **27**, 100910.
- 62 6. P. Liu, Z. Yao, V. M. H. Ng, J. Zhou, L. B. Kong and K. Yue, *Compos. Part A Appl. Sci. Manuf.*,  
63 2018, **115**, 371-382.
- 64 7. T. Hou, B. Wang, M. Ma, A. Feng, Z. Huang, Y. Zhang, Z. Jia, G. Tan, H. Cao and G. Wu,  
65 *Compos. Part B Eng.*, 2020, **180**, 107577.
- 66 8. F. Pan, L. Yu, Z. Xiang, Z. Liu, B. Deng, E. Cui, Z. Shi, X. Li and W. Lu, *Carbon*, 2021, **172**,  
67 506-515.
- 68 9. D. Zhang, Y. Xiong, J. Cheng, J. Chai, T. Liu, X. Ba, S. Ullah, G. Zheng, M. Yan and M. Cao,  
69 *Sci. Bull.*, 2020, **65**, 138-146.
- 70 10. F. Wu, Z. Liu, J. Wang, T. Shah, P. Liu, Q. Zhang and B. Zhang, *Chem. Eng. J.*, 2021, **422**,  
71 130591.
- 72 11. J. Zhou, F. Guo, J. Luo, G. Hao, G. Liu, Y. Hu, G. Zhang, H. Guo, H. Zhou and W. Jiang, *J.*  
73 *Mater. Chem. C*, 2022, **10**, 1470-1478.
- 74 12. N. Zhang, Y. Huang, M. Zong, X. Ding, S. Li and M. Wang, *Chem. Eng. J.*, 2017, **308**, 214-221.
- 75 13. L. Wu, X. Liu, G. Wan, X. Peng, Z. He, S. Shi and G. Wang, *Chem. Eng. J.*, 2022, **448**, 137600.
- 76 14. M. He, H. Chen, H. Peng, Y. Zhou, Z. Song, Y. Wang, S. Feng and X. Bu, *Chem. Eng. J.*, 2023,  
77 **456**, 140985.
- 78 15. B. Wang, Z. Xu, H. Wu, F. Huang, F. Liu, S. Li and H. Zhang, *Compos. Part B Eng.*, 2023, **257**,

79 110669.

80
